# Supplementary material
Source: HighWire-hosted journal article supplement (http://cmajopen.ca/highwire/filestream/81205/field_highwire_adjunct_files/1/process-checklist.pdf)
Supplement: process-checklist.pdf [file process-checklist.pdf]

| <b>PROCESS Checklist</b> |             |                                                                                                                                                                                                                                                                                                                                                                                                       |                    |
|--------------------------|-------------|-------------------------------------------------------------------------------------------------------------------------------------------------------------------------------------------------------------------------------------------------------------------------------------------------------------------------------------------------------------------------------------------------------|--------------------|
| <b>Section</b>           | <b>Item</b> | <b>Checklist Description</b>                                                                                                                                                                                                                                                                                                                                                                          | <b>Page Number</b> |
| <b>Title</b>             | 1           | The words "case series" and the area of focus should appear in the title (e.g. disease, exposure/intervention or outcome).                                                                                                                                                                                                                                                                            | 1                  |
| <b>Abstract</b>          | 2a          | Introduction - what is the unifying theme of the case series.                                                                                                                                                                                                                                                                                                                                         | 2                  |
|                          | 2b          | Methods - describe what was done, how and when was it done and by whom.                                                                                                                                                                                                                                                                                                                               |                    |
|                          | 2c          | Results - what was found.                                                                                                                                                                                                                                                                                                                                                                             |                    |
|                          | 2d          | Conclusion - what have we learned and what does it mean                                                                                                                                                                                                                                                                                                                                               |                    |
| <b>Introduction</b>      | 3           | Explain the scientific background and rationale for the case series. What is the unifying theme - common disease, exposure, intervention and outcome, etc. Why is this study needed?                                                                                                                                                                                                                  | 3                  |
| <b>Methods</b>           | 4a          | Registration and ethics - state the research registry number in accordance with the declaration of Helsinki - "Every research study involving human subjects must be registered in a publicly accessible database" (this can be obtained from; ResearchRegistry.com or ClinicalTrials.gov or ISRCTN). State whether ethical approval was needed and if so, what the relevant judgement reference was? | 4                  |
|                          | 4b          | Study design - state the study is a case series and whether prospective or retrospective in design, whether single or multi-centre and whether cases are consecutive or non-consecutive.                                                                                                                                                                                                              | 4                  |
|                          | 4c          | Setting - describe the setting(s) and nature of the institution in which the patient was managed; academic, community or private practice setting? Location(s), and relevant dates, including periods of recruitment, exposure, follow-up, and data collection                                                                                                                                        | 4                  |

|    |                                                                                                                                                                                                                                                                                                                                                                                      |            |
|----|--------------------------------------------------------------------------------------------------------------------------------------------------------------------------------------------------------------------------------------------------------------------------------------------------------------------------------------------------------------------------------------|------------|
| 4d | Participants - describe the relevant characteristics of the participants (comorbidities, tumour staging, smoking status, etc). State any eligibility (inclusion/exclusion) criteria and the sources and methods of selection of participants. Describe length and methods of follow-up.                                                                                              | 4          |
| 4e | Pre-intervention considerations e.g. Patient optimisation: measures taken prior to surgery or other intervention e.g. treating hypothermia/hypovolaemia/hypotension in burns patients, ICU care for sepsis, dealing with anticoagulation/other medications and so on.                                                                                                                | 4          |
| 4f | Types of intervention(s) deployed and reasoning behind treatment offered (pharmacological, surgical, physiotherapy, psychological, preventive) and concurrent treatments (antibiotics, analgesia, anti-emetics, nil by mouth, VTE prophylaxis, etc). Medical devices should have manufacturer and model specifically mentioned.                                                      | 4, Table 1 |
| 4g | Peri-intervention considerations - administration of intervention (what, where, when and how was it done, including for surgery; anaesthesia, patient position, use of tourniquet and other relevant equipment, preparation used, sutures, devices, surgical stage (1 or 2 stage, etc). Pharmacological therapies should include formulation, dosage, strength, route and duration). | 4, Table 1 |
| 4h | Who performed the procedures - operator experience (position on the learning curve for the technique if established, specialisation and prior relevant training).                                                                                                                                                                                                                    | NA         |
| 4i | Quality control - what measures were taken to reduce inter or intra-operator variation. What measures were taken to ensure quality and consistency in the delivery of the intervention e.g. independent observers, lymph node counts, etc                                                                                                                                            | NA         |
| 4j | Post-intervention considerations e.g. post-operative instructions and place of care. Important follow-up measures - diagnostic and other test results. Future surveillance requirements - e.g.                                                                                                                                                                                       | NA         |

|                   |    |                                                                                                                                                                                                                                                                                                                                                                  |            |
|-------------------|----|------------------------------------------------------------------------------------------------------------------------------------------------------------------------------------------------------------------------------------------------------------------------------------------------------------------------------------------------------------------|------------|
|                   |    | imaging surveillance of endovascular aneurysm repair (EVAR) or clinical exam/ultrasound of regional lymph nodes for skin cancer.                                                                                                                                                                                                                                 |            |
| <b>Results</b>    | 5a | Participants - reports numbers involved and their characteristics (comorbidities, tumour staging, smoking status, etc).                                                                                                                                                                                                                                          | Table 1, 5 |
|                   | 5b | Any changes in the interventions during the course of the case series (how has it evolved, been tinkered with, what learning occurred, etc) together with rationale and a diagram if appropriate. Degree of novelty for a surgical technique/device should be mentioned and a comment on learning curves should be made for new techniques/devices.              | NA         |
|                   | 5c | Outcomes and follow-up - Clinician assessed and patient-reported outcomes (when appropriate) should be stated with inclusion of the time periods at which assessed. Relevant photographs/radiological images should be provided e.g. 12 month follow-up.                                                                                                         | NA         |
|                   | 5d | Where relevant - intervention adherence/compliance and tolerability (how was this assessed). Describe loss to follow-up (express as a percentage) and any explanations for it.                                                                                                                                                                                   | NA         |
|                   | 5e | Complications and adverse or unanticipated events. Described in detail and ideally categorised in accordance with the Clavien-Dindo Classification. How they were prevented, diagnosed and managed. Blood loss, operative time, wound complications, re-exploration/revision surgery, 30-day post-op and long-term morbidity/mortality may need to be specified. | NA         |
| <b>Discussion</b> | 6a | Summarise key results                                                                                                                                                                                                                                                                                                                                            | 5-6        |
|                   | 6b | Discussion of the relevant literature, implications for clinical practice guidelines, how have the indications for a new technique/device been refined and how do outcomes compare with established therapies and the prevailing gold standard should one exist and any relevant hypothesis generation.                                                          | 6          |

|                               |    |                                                                            |   |
|-------------------------------|----|----------------------------------------------------------------------------|---|
|                               | 6c | Strengths and limitations of the study                                     | 7 |
|                               | 6d | The rationale for any conclusions?                                         | 7 |
| <b>Conclusions</b>            | 7a | State the key conclusions from the study                                   | 8 |
|                               | 7b | State what needs to be done next, further research with what study design. | 8 |
| <b>Additional Information</b> | 8a | State any conflicts of interest                                            | 1 |
|                               | 8b | State any sources of funding                                               | 1 |
